# Supplementary material for: Hsa_circ_0005273 facilitates breast cancer tumorigenesis by regulating YAP1-hippo signaling pathway
Source: Springer Nature journal article supplement (doi:10.1186/s13046-021-01830-z), 2021-01-12

Original western blotting images in Fig. 2J

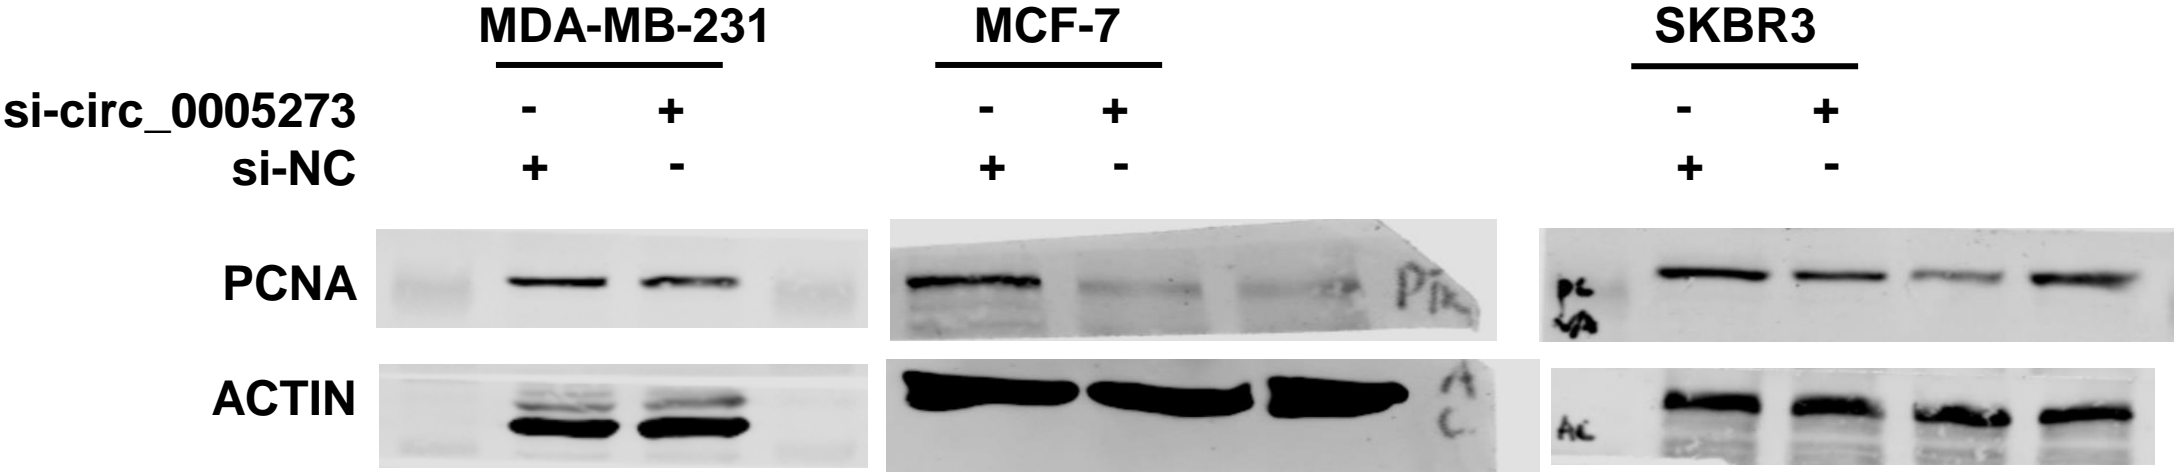

Original western blotting images in Fig. 4J

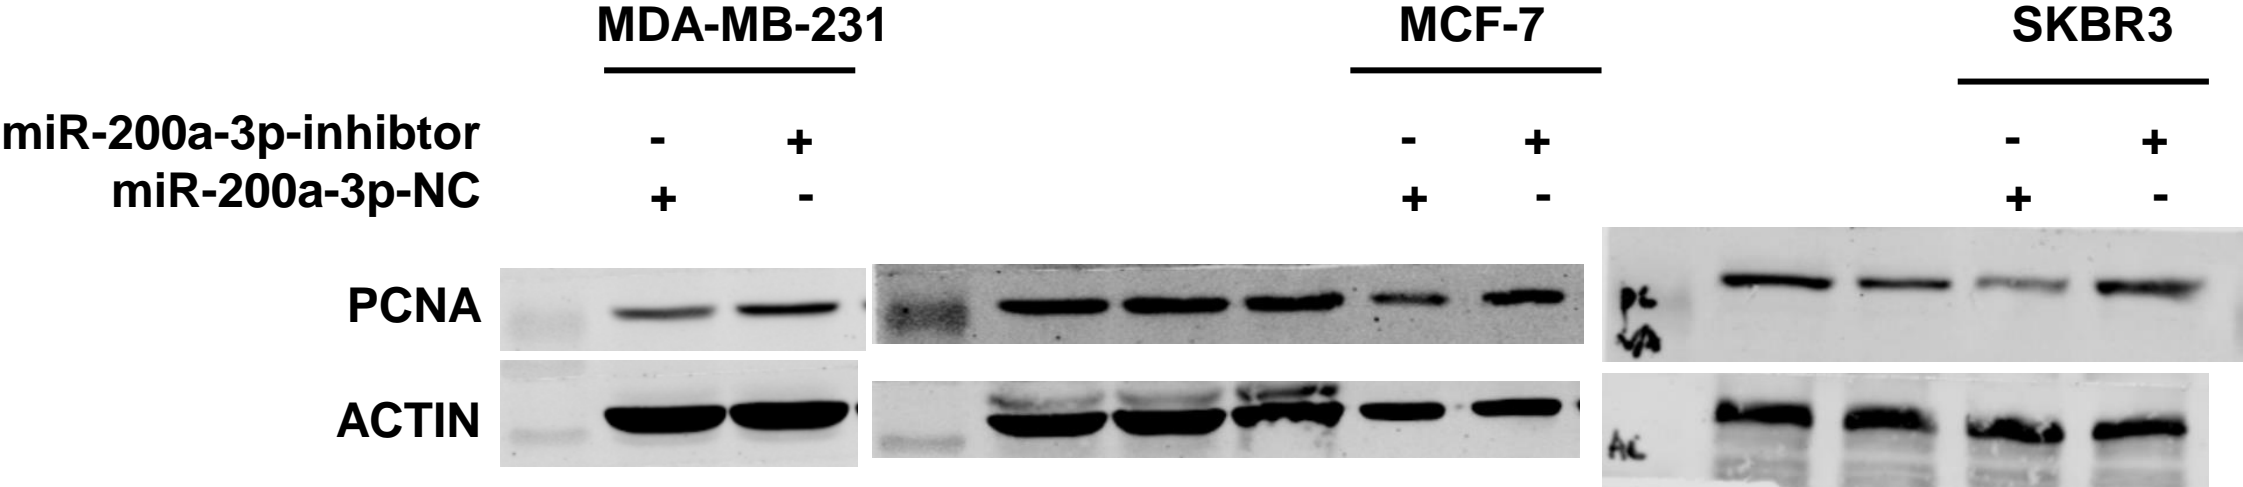

Original western blotting images in Fig. 5H

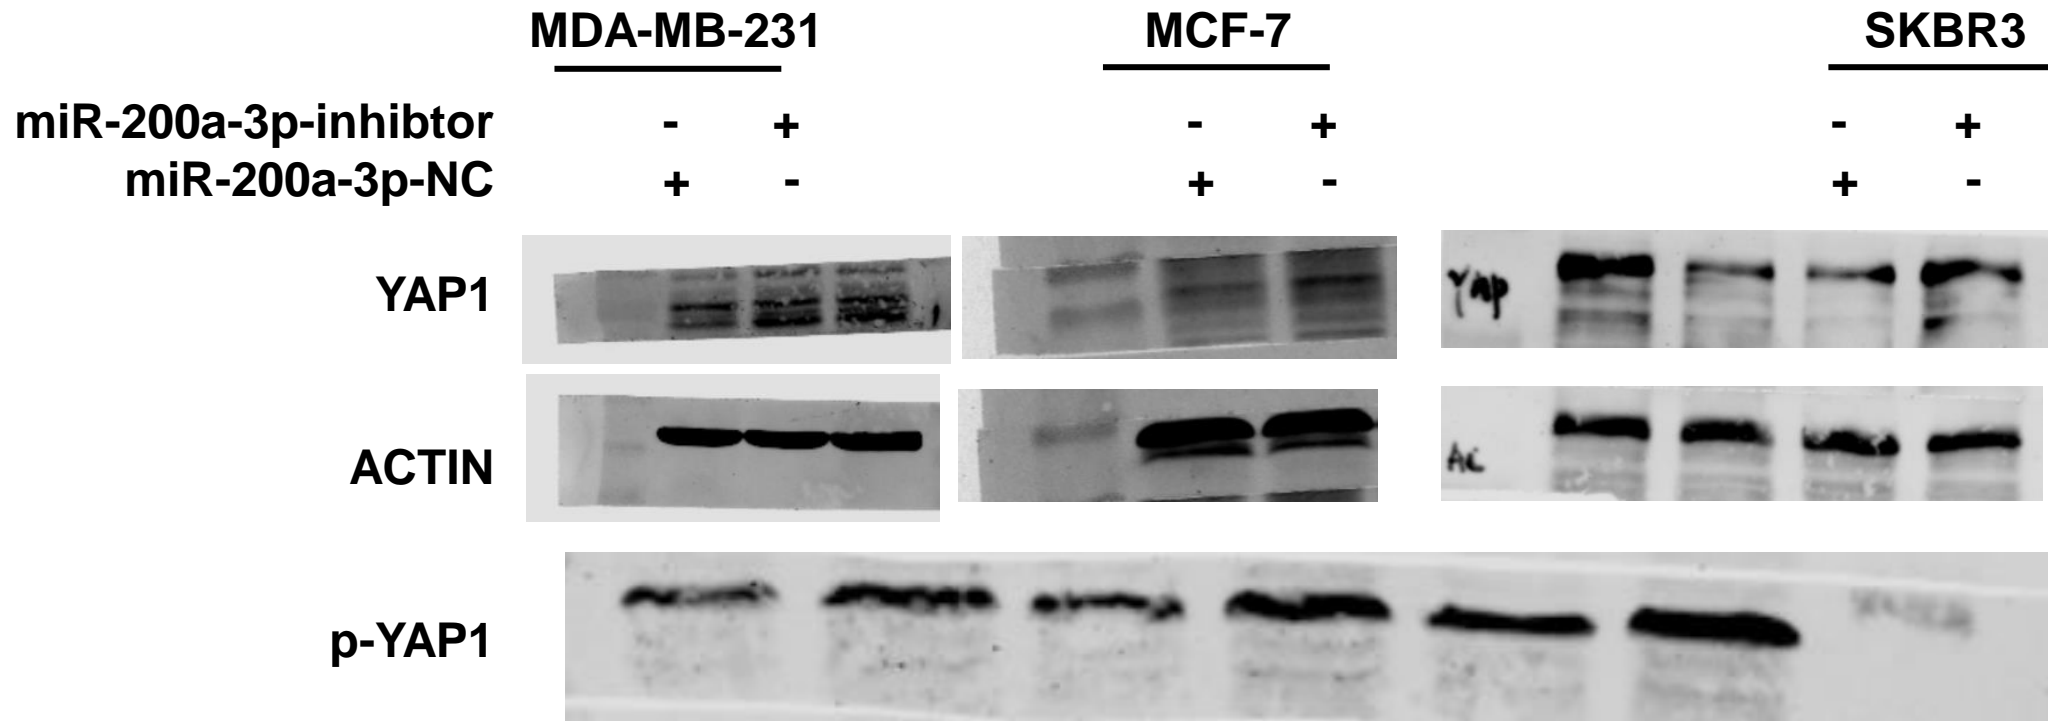

Original western blotting images in Fig. 5J

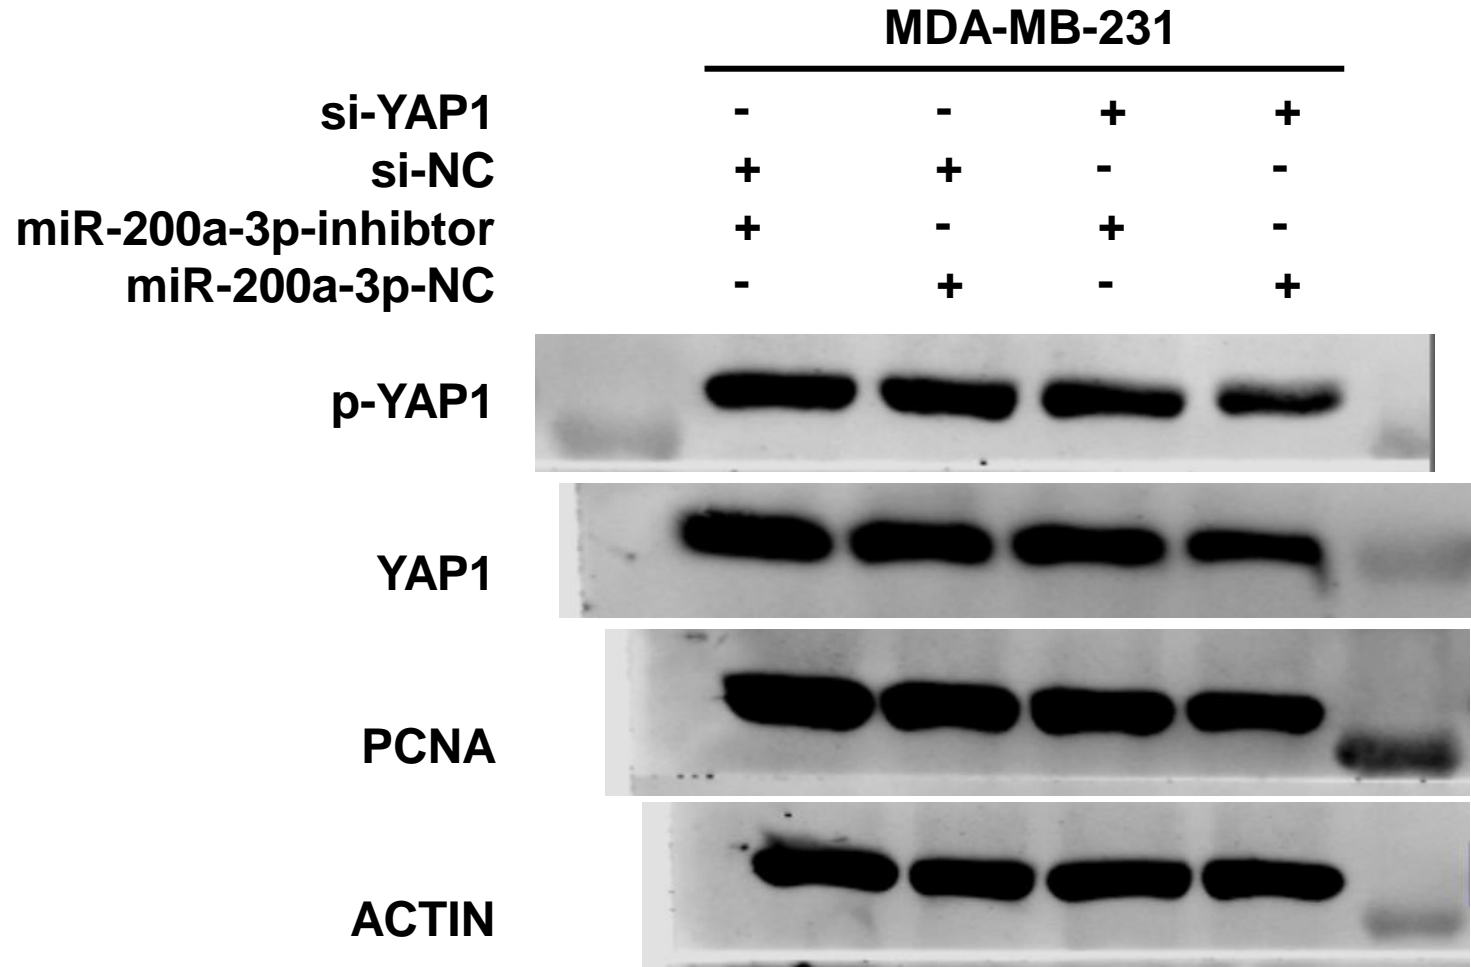

Original western blotting images in Fig. 5L

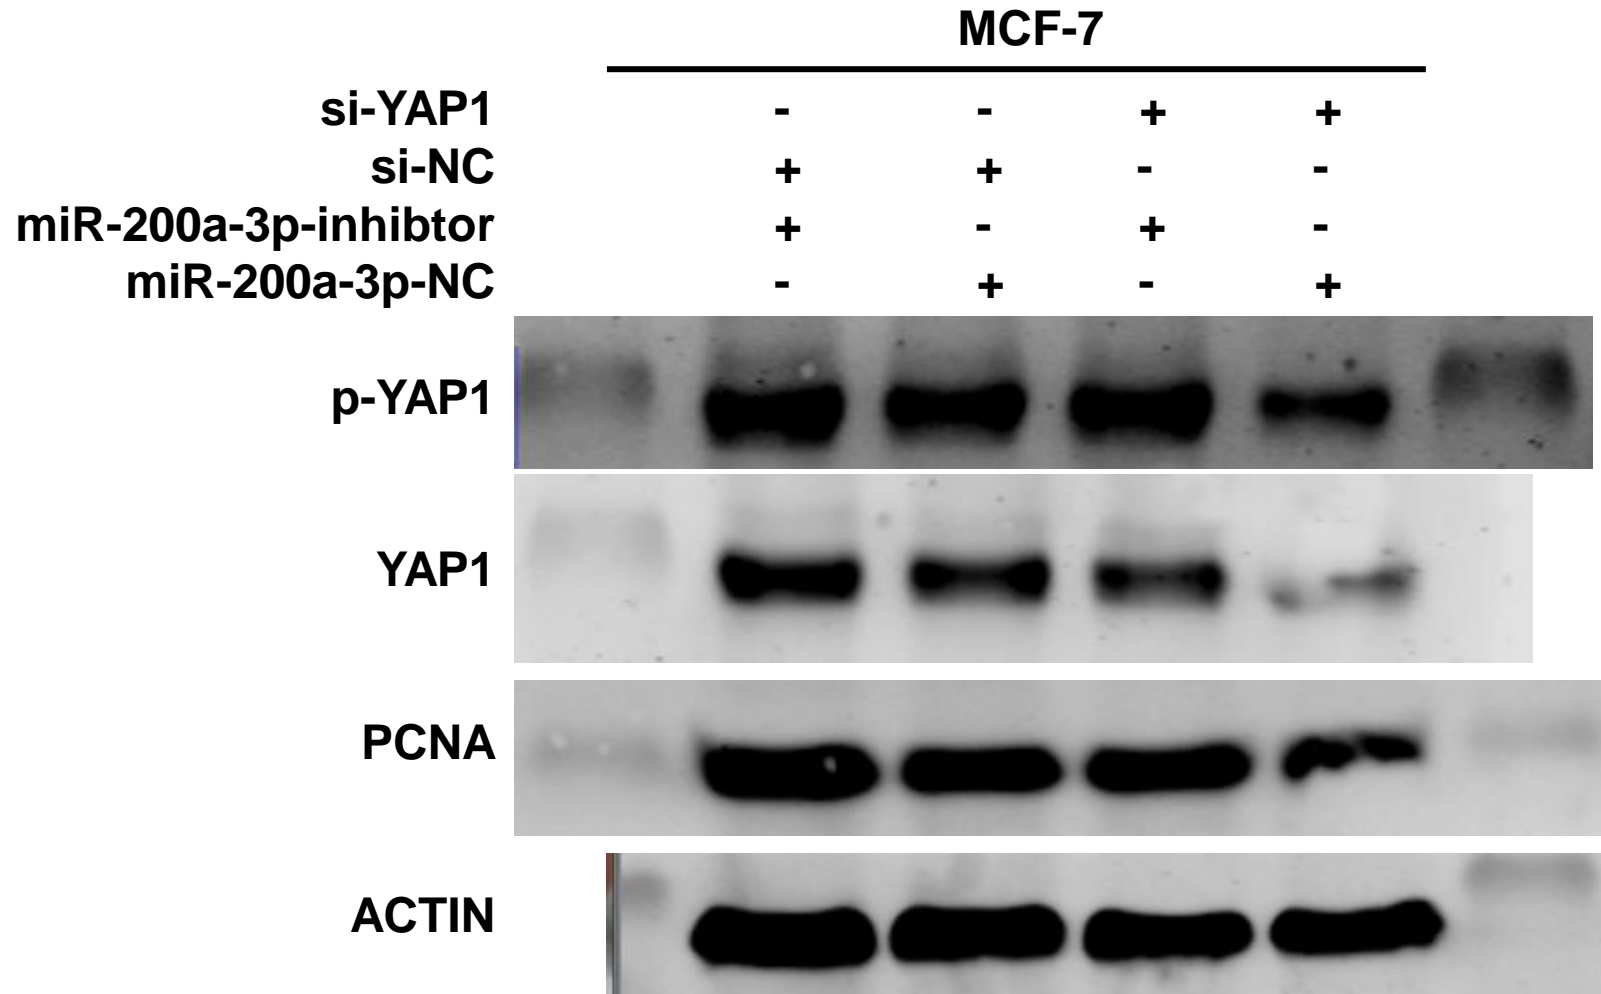

Original western blotting images in Fig. 5N

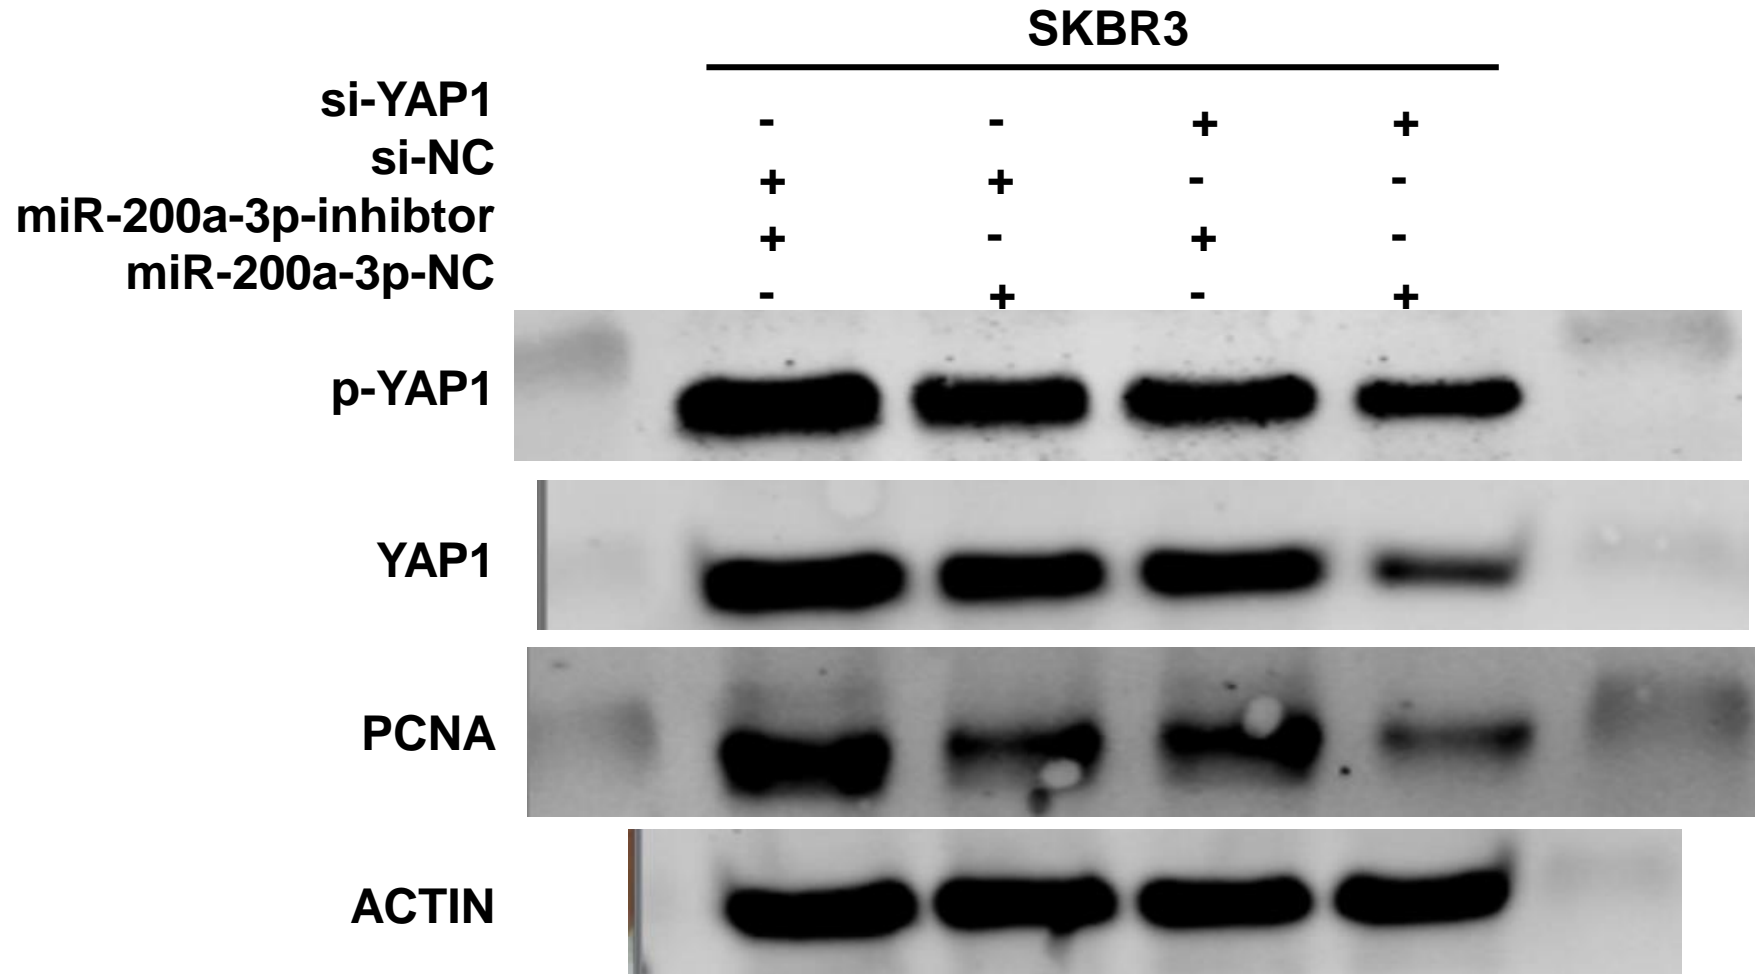

Original western blotting images in Fig. 6D

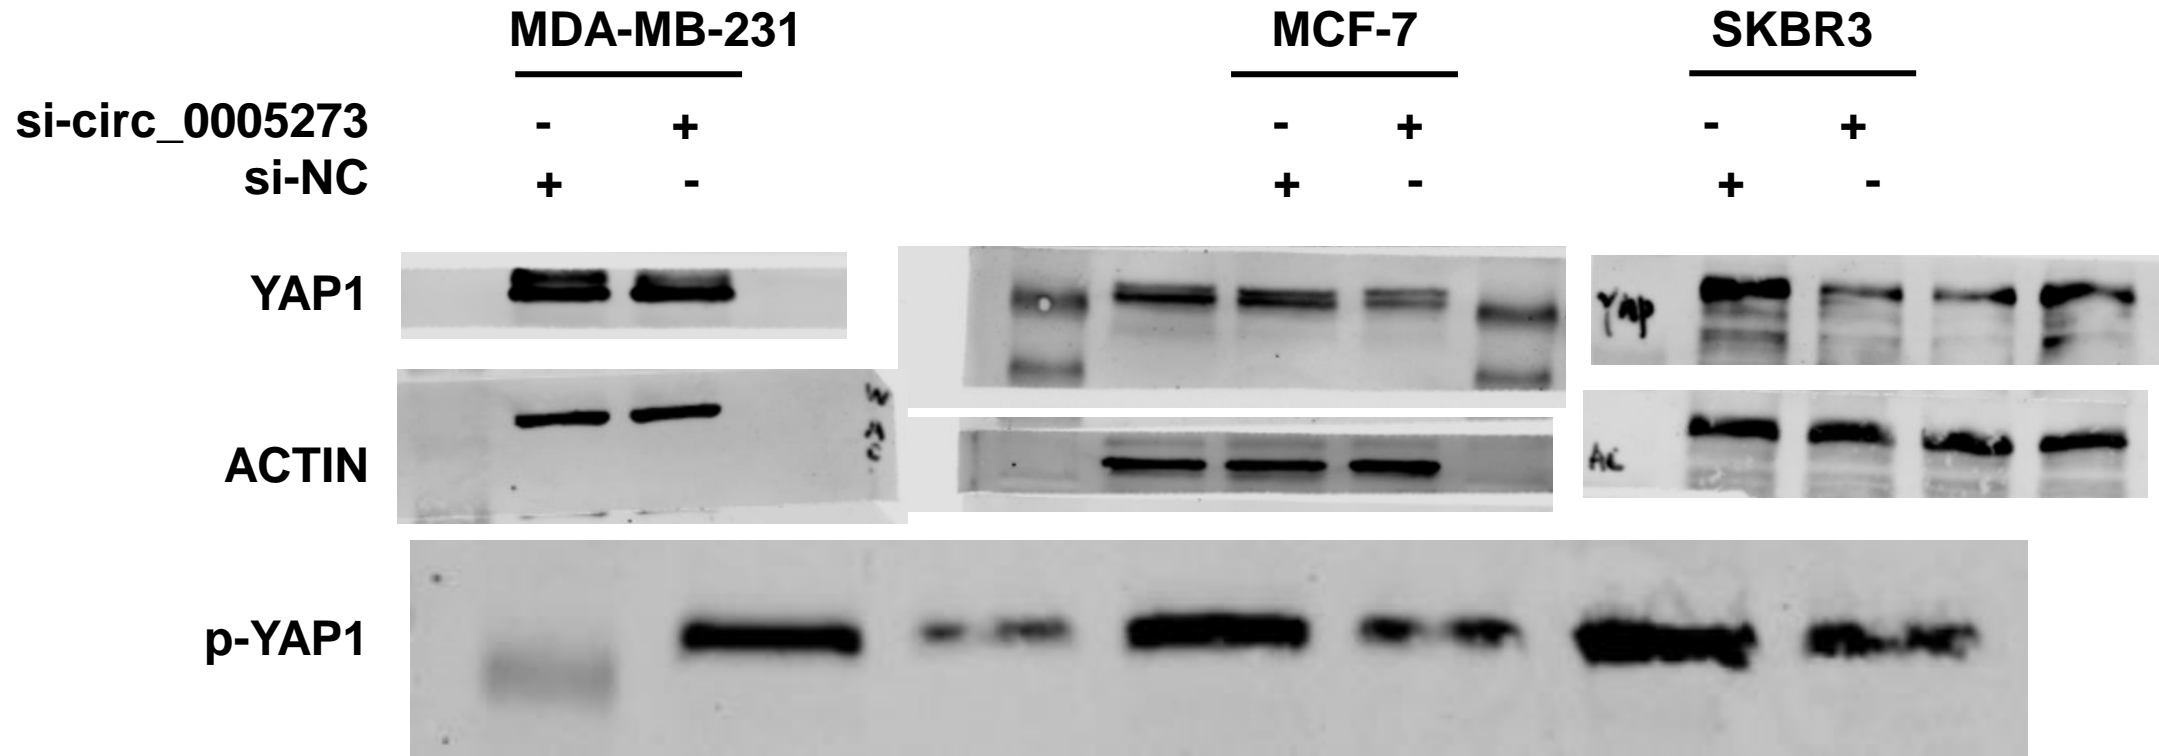

Original western blotting images in Fig. 6L

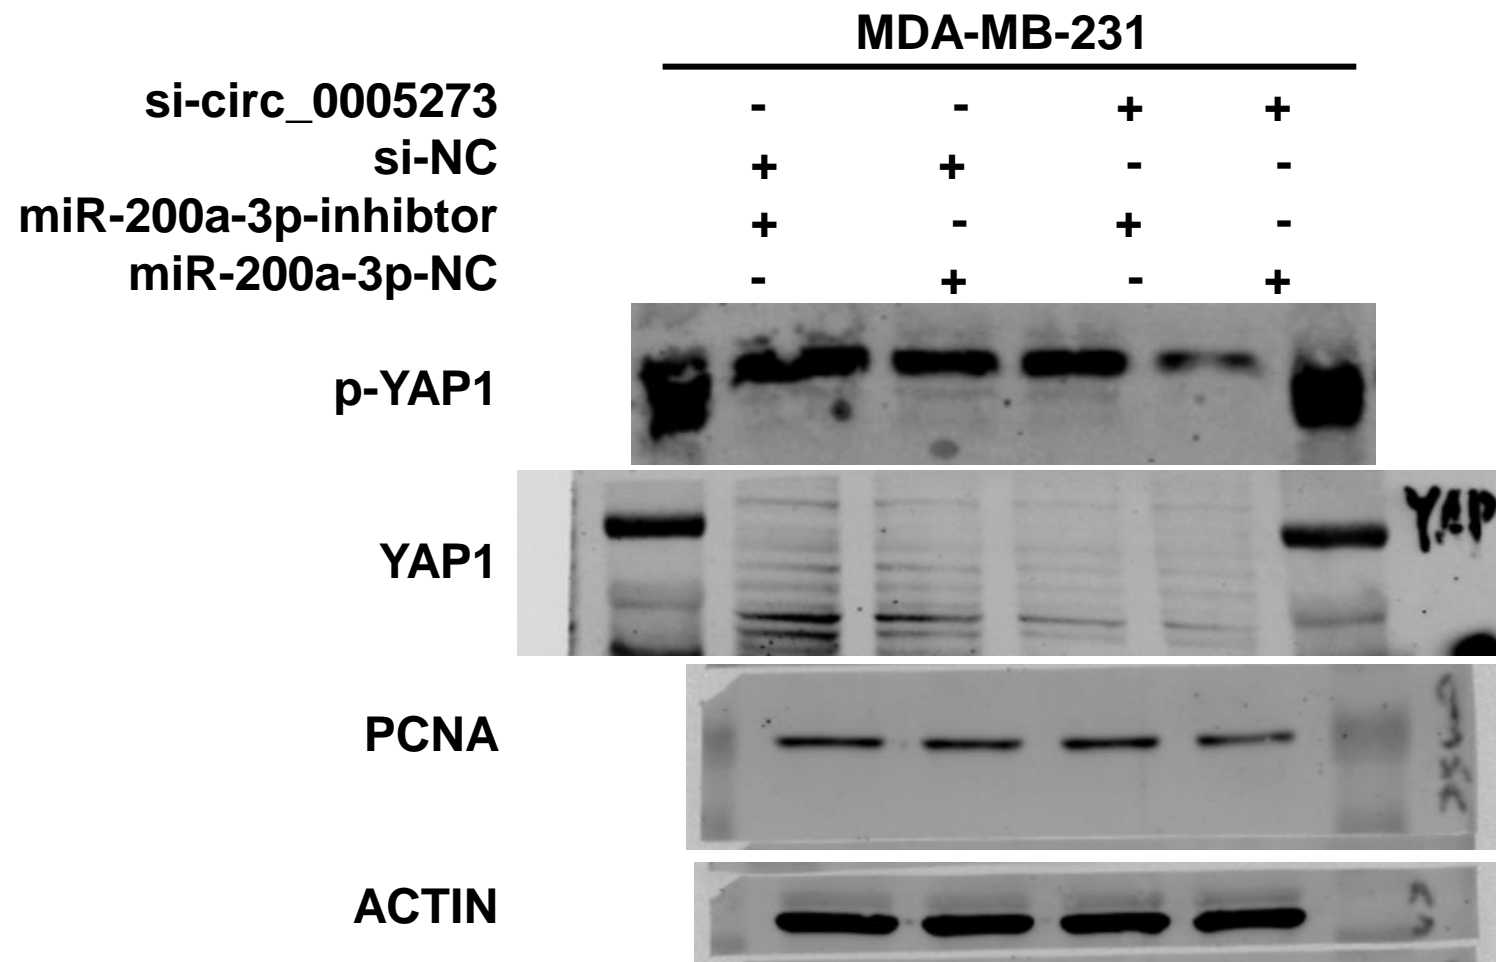



Original western blotting images in Fig. 6M

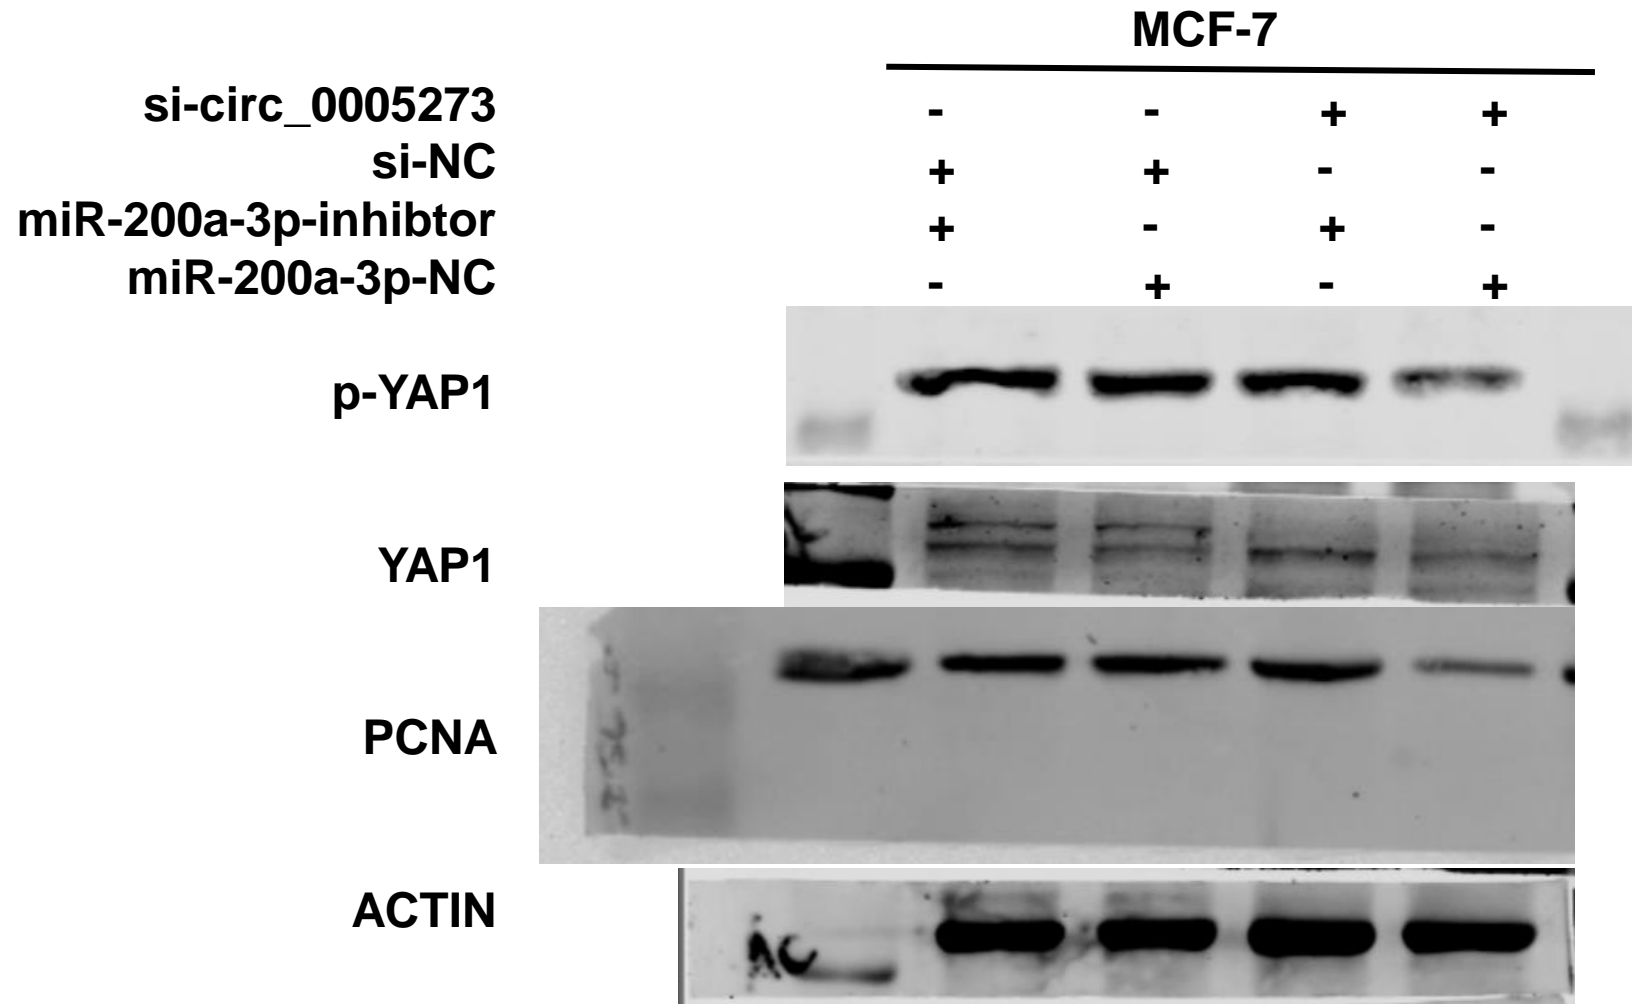

Original western blotting images in Fig. 6N

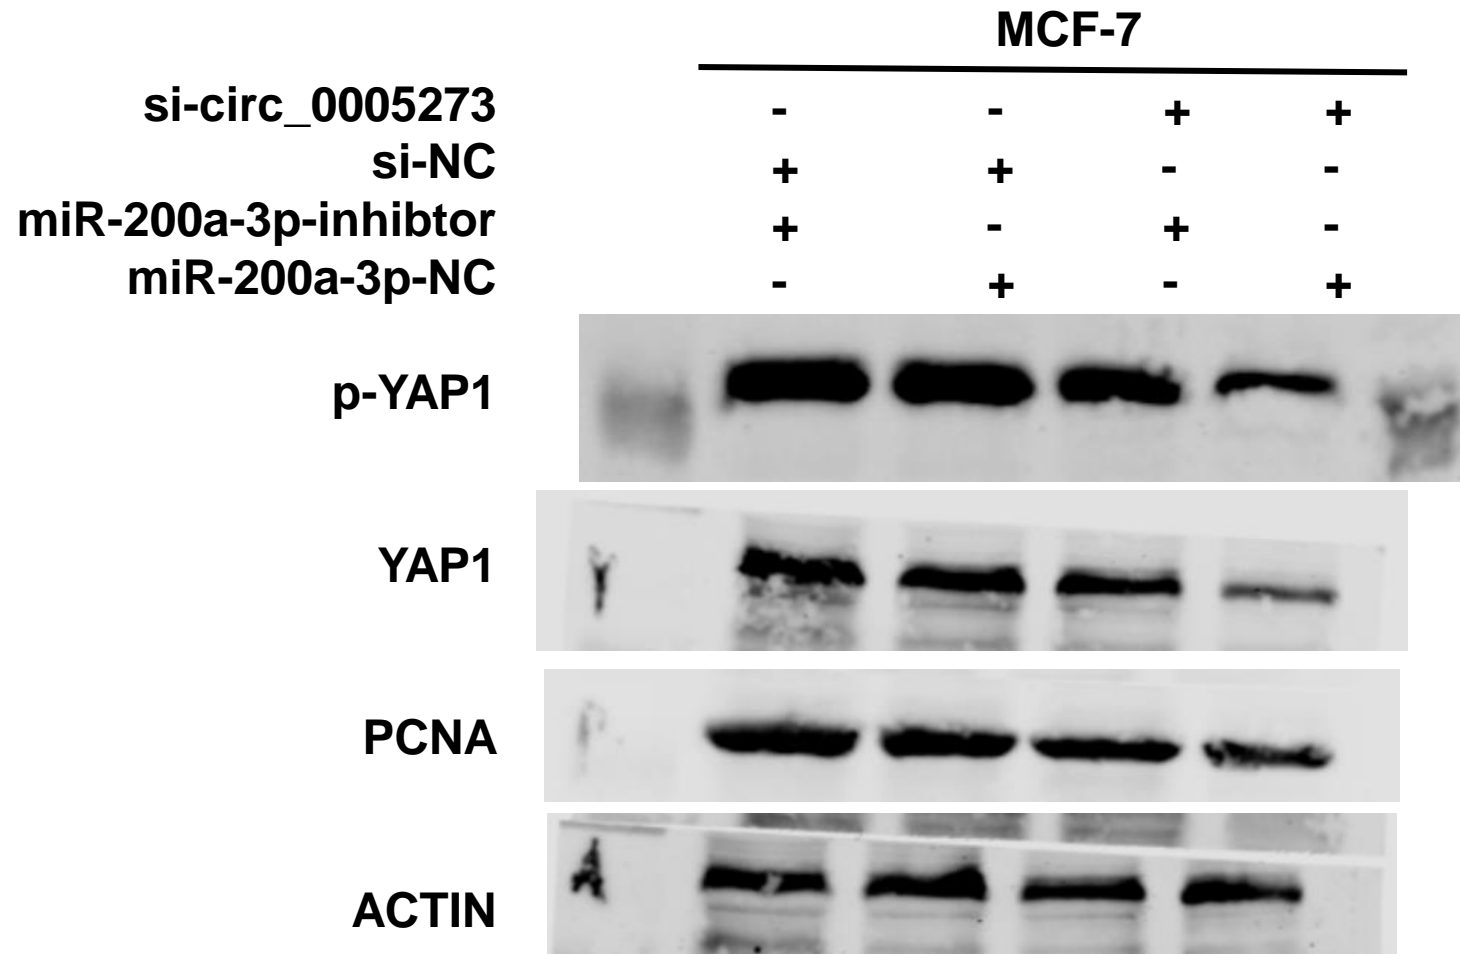

# Original western blotting images in Fig. 7H

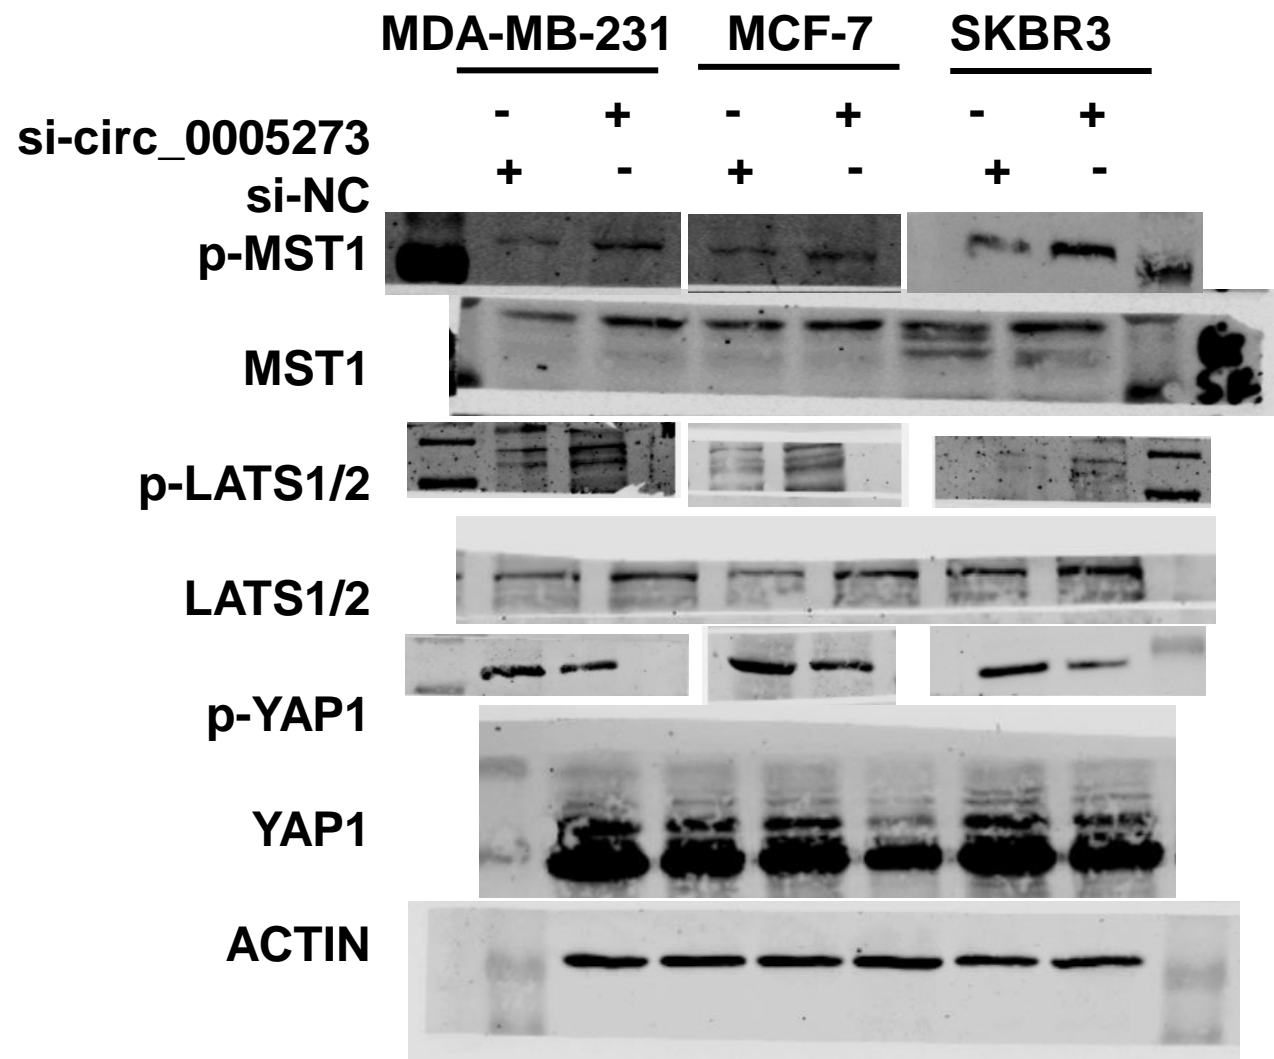

# Original western blotting images in Fig. 7I

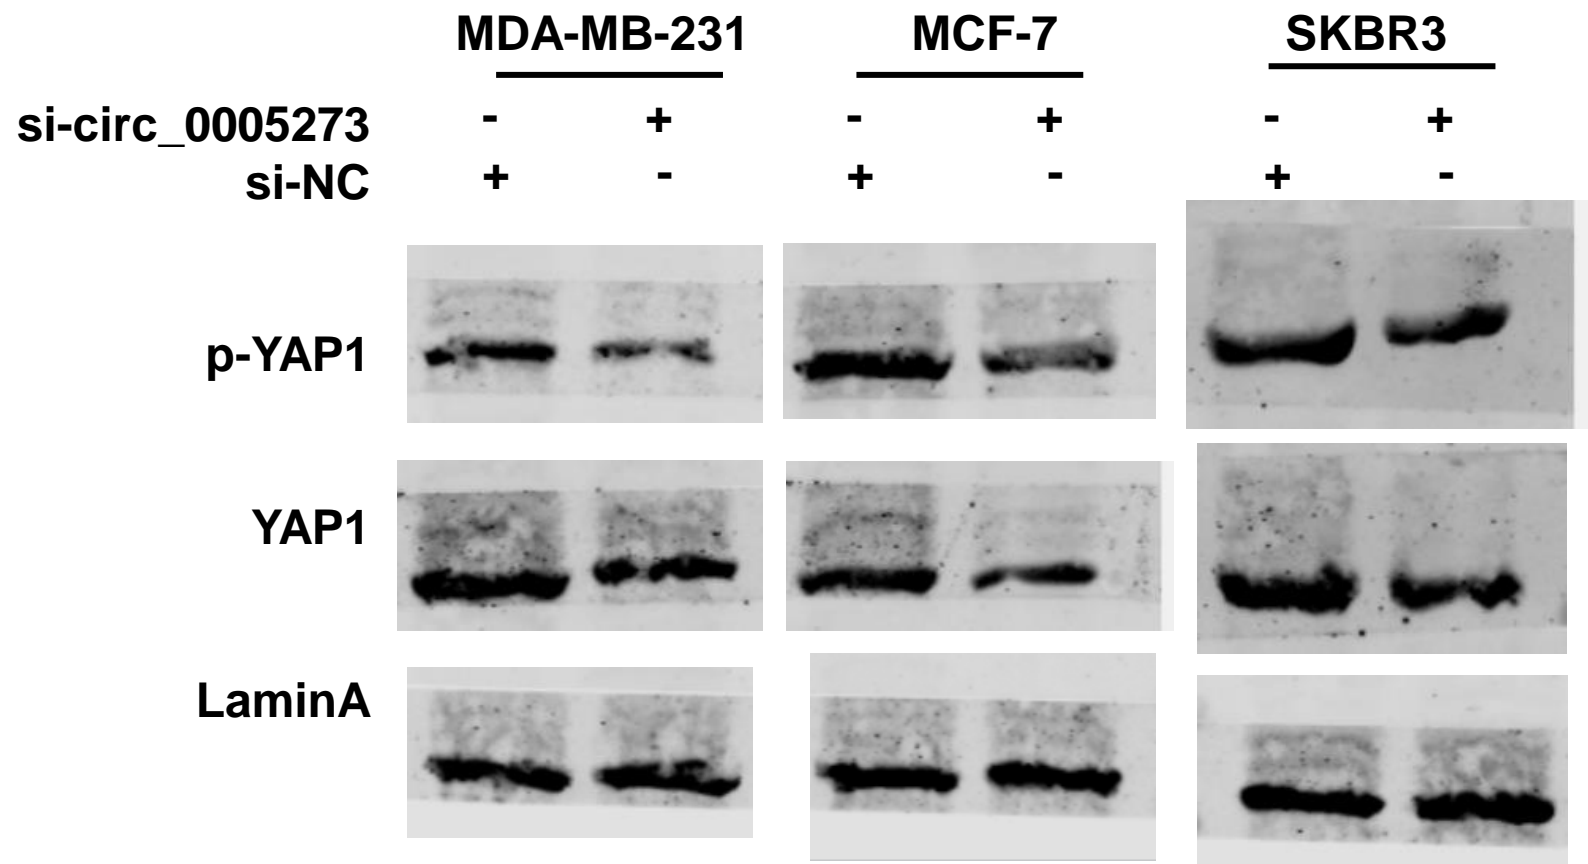

Original western blotting images in Fig. 7K

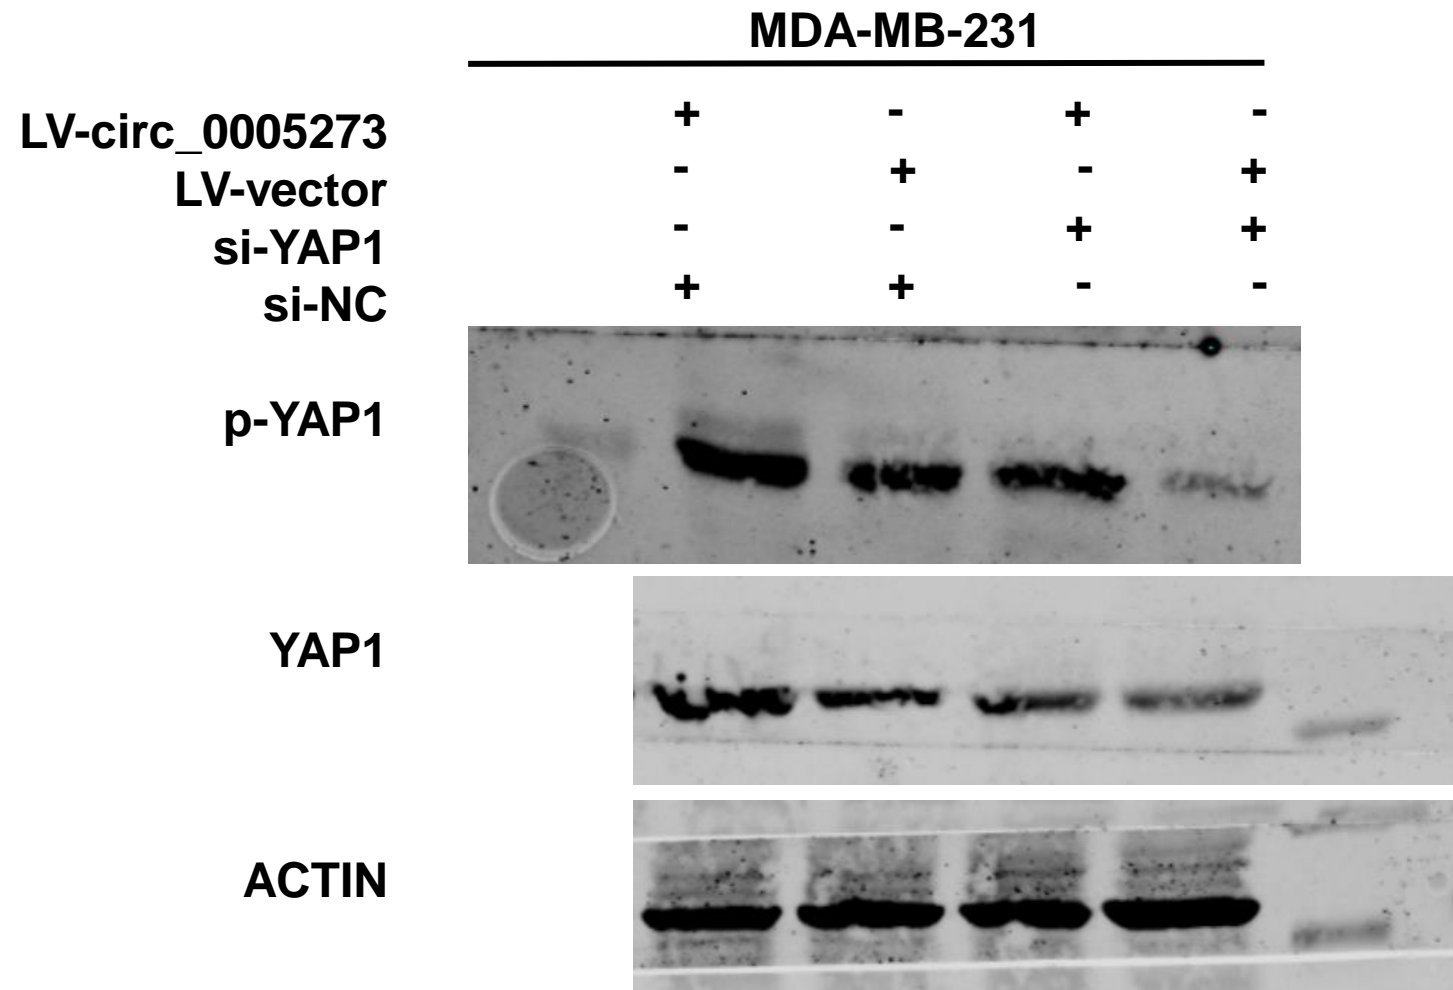

Original western blotting images in Fig. 7M

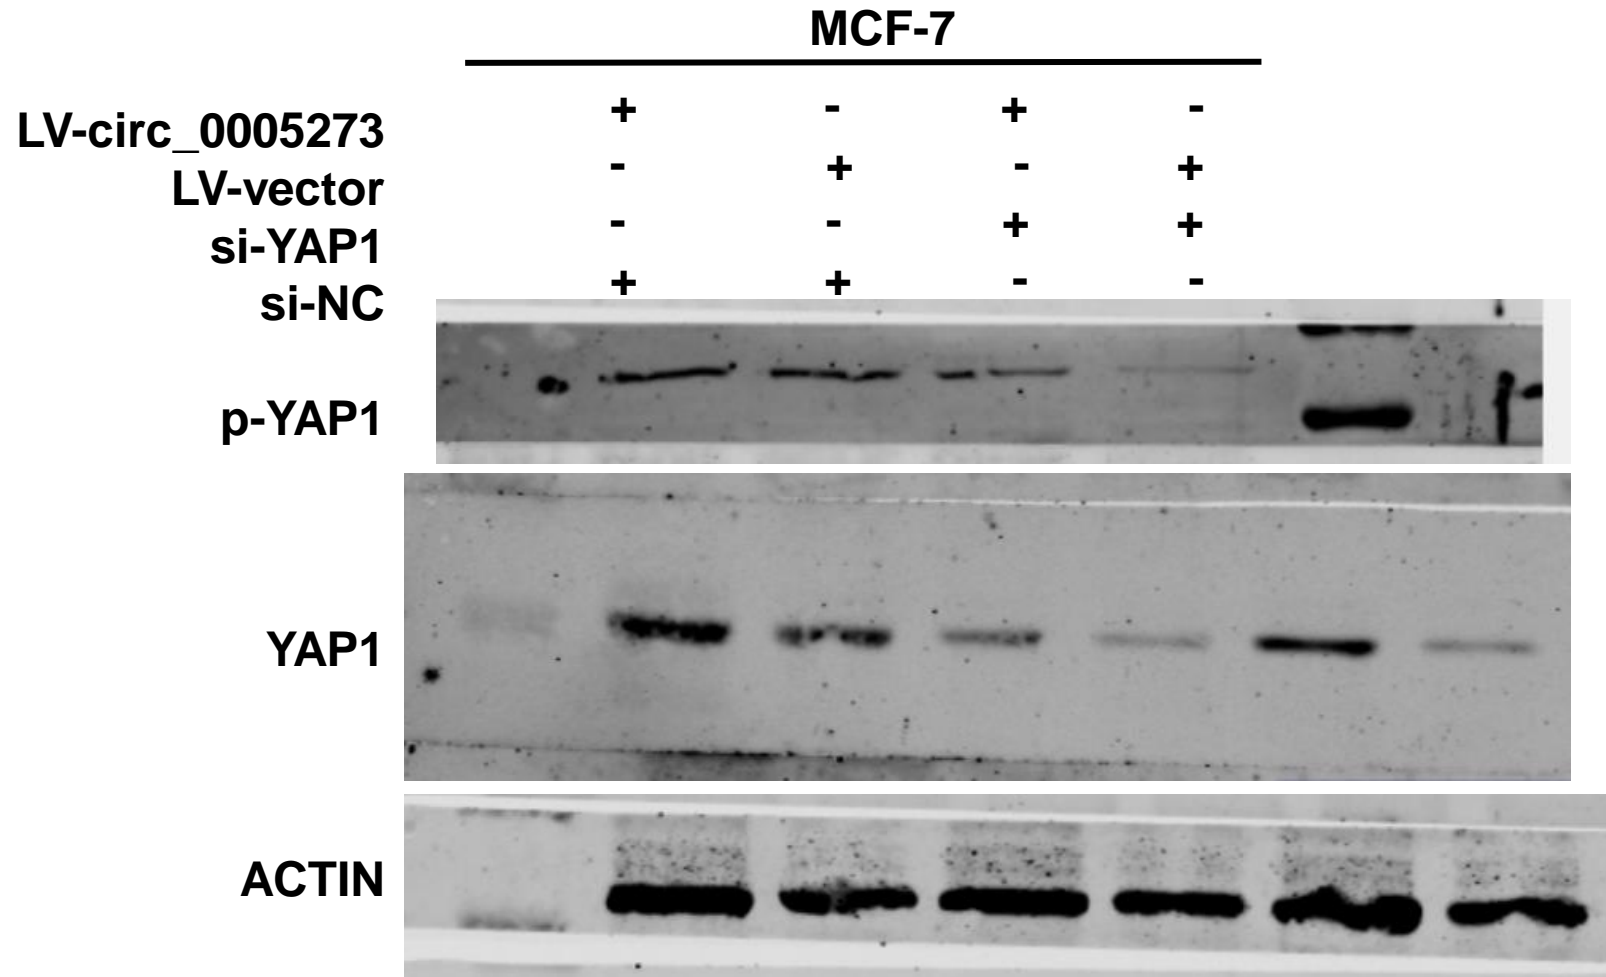

Original western blotting images in Fig. 70

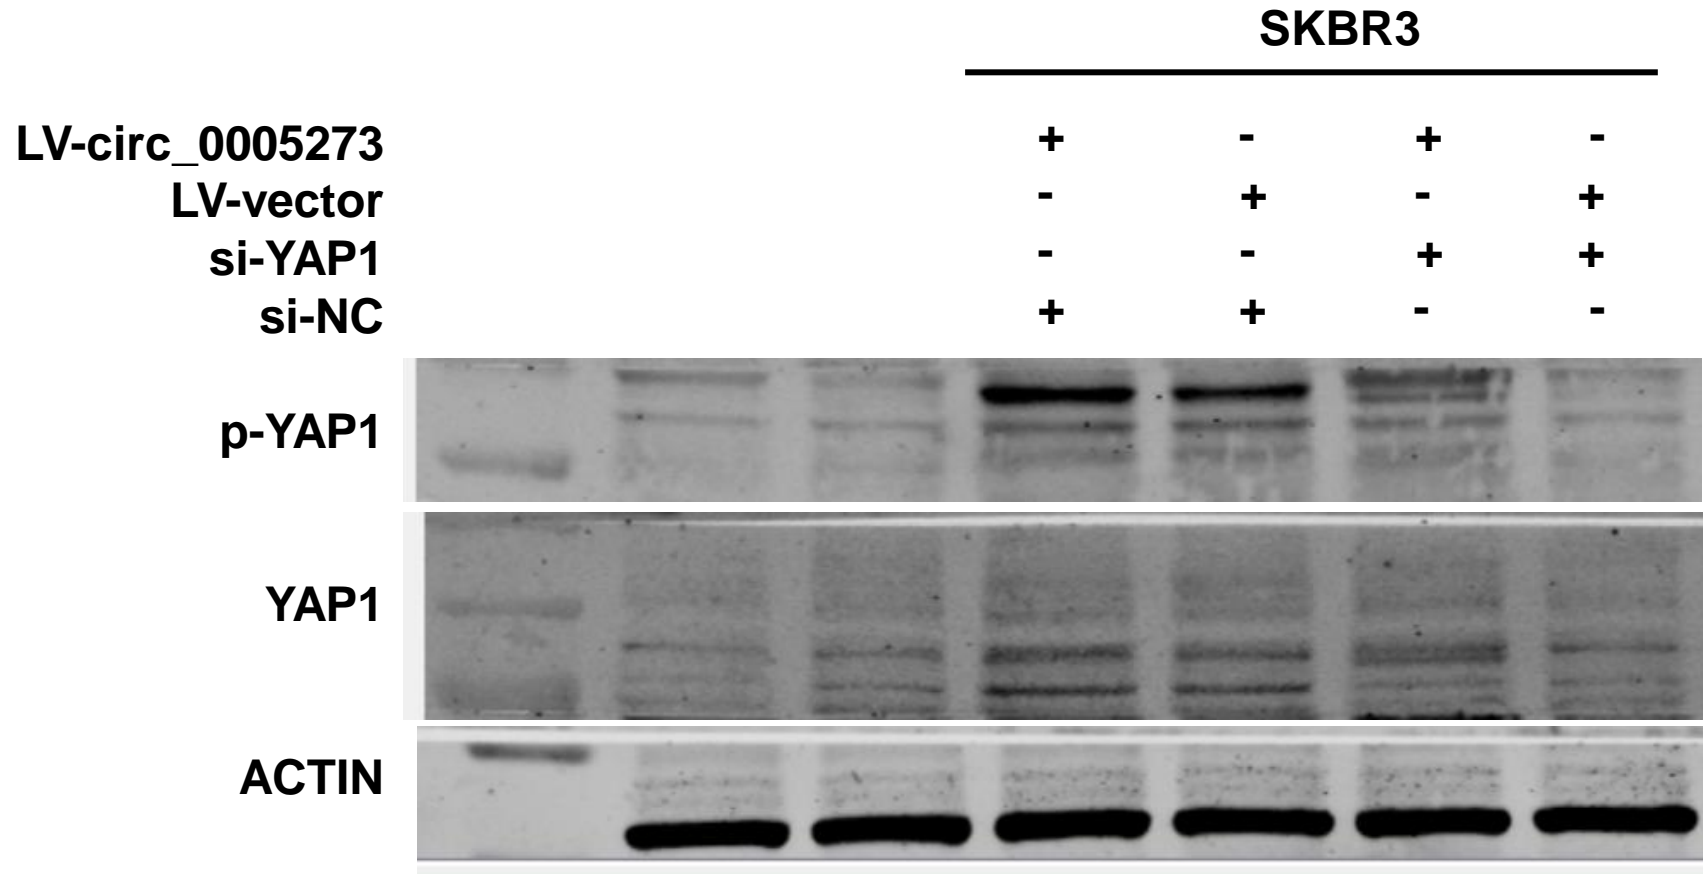

Original western blotting images in Fig. 8F

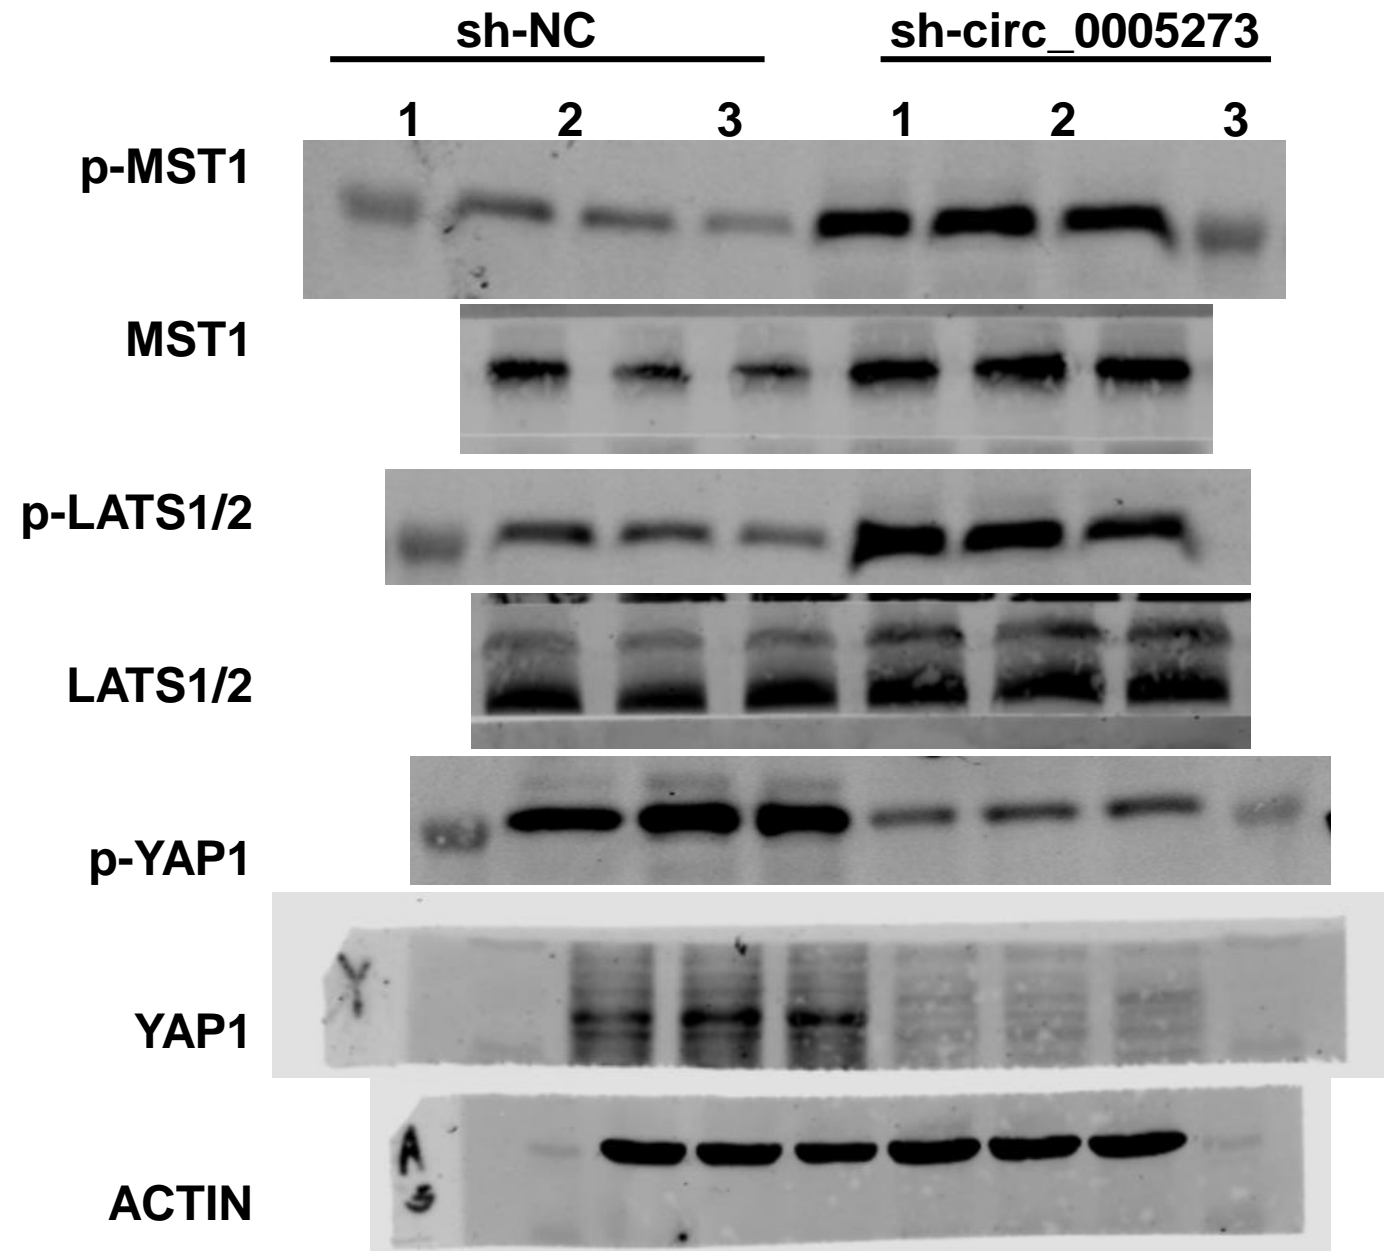



Original western blotting images in Fig. S1D

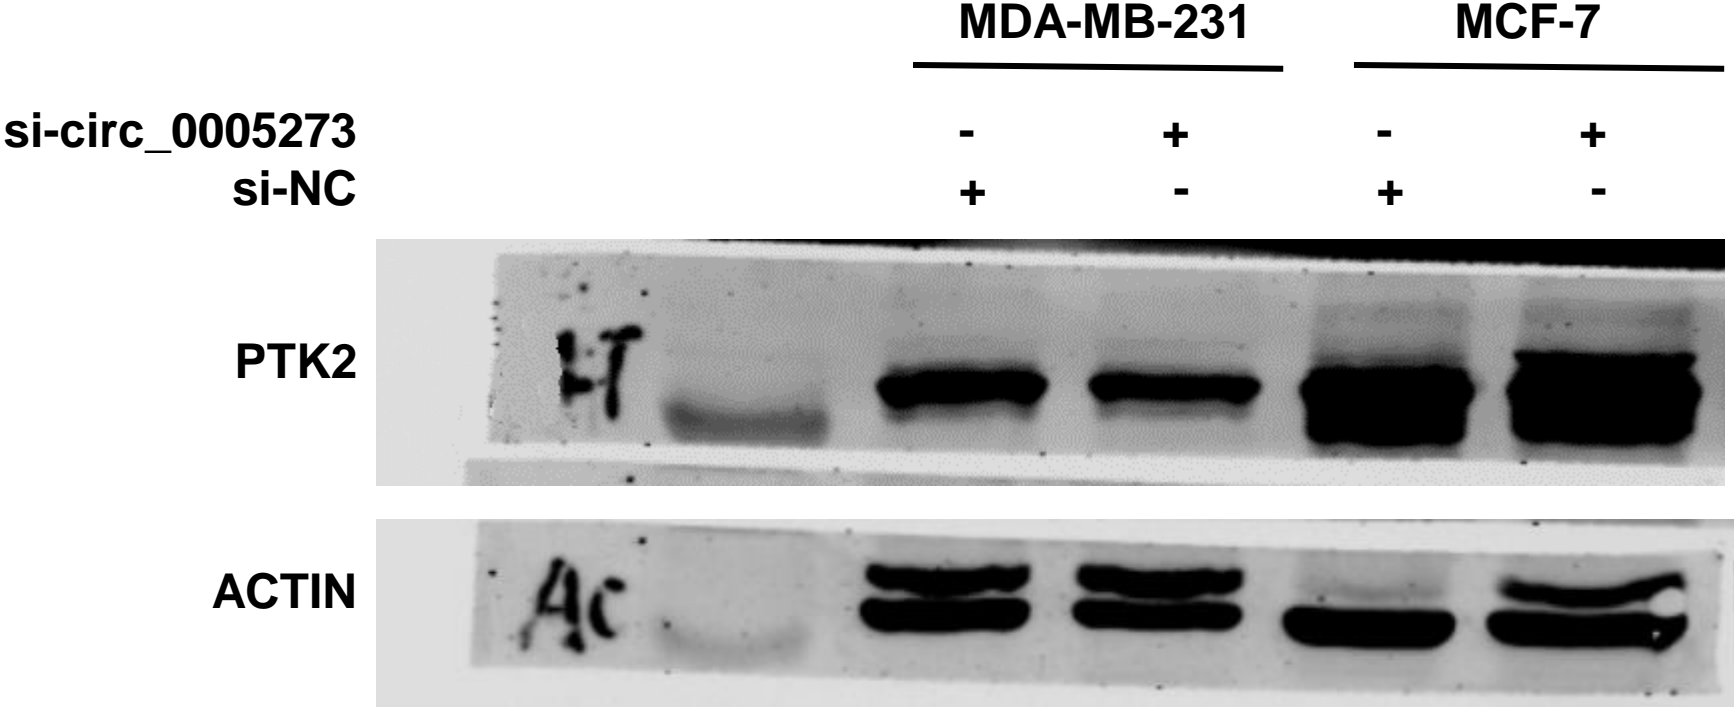

Original western blotting images in Fig. S1E

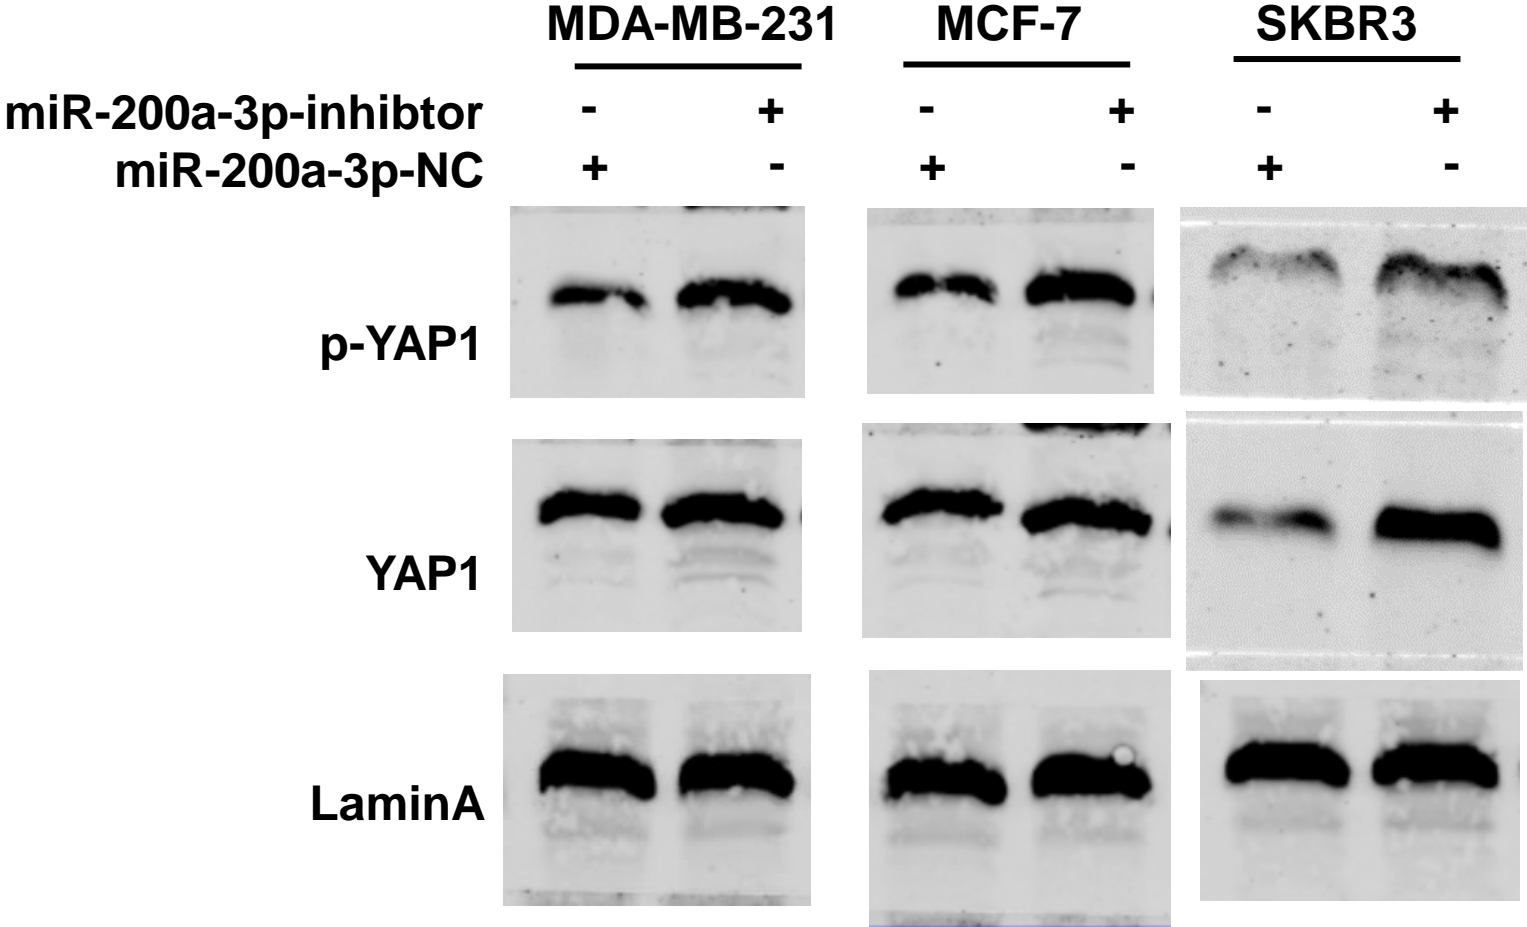

Supplement: MOESM6 [file 18762370]
